# Supplementary material for: Inter‐breeder differences in prepulse inhibition deficits of C57BL/6J mice in a maternal immune activation model
Source: PubMed Central journal article supplement — Neuropsychopharmacol Rep. 2021 May 27;41(3):416–21. doi: 10.1002/npr2.12178 (PMC8411318; doi:10.1002/npr2.12178), 2021-05-27
Supplement: NPR2-41-416-s001.pdf [file NPR2-41-416-s001.pdf]

## <Supplementary Materials>

### Inter-breeder differences in prepulse inhibition deficits of C57BL/6J mice in a maternal immune activation model

Yutaro Kobayashi, Hiroyoshi Inaba, Yuriko Iwakura, Hisaaki Namba, Hidekazu Sotoyama, Yui Murata, Kazuya Iwamoto, and Hiroyuki Nawa

**Supplemental Figure S1;** Preliminary assessment of Poly(I:C) dose effects on prepulse inhibition.

Pregnant dams of C57BL/6J mice were obtained from CLEA Japan Inc. and challenged with the different doses (2, 4 and 8 mg/kg, iv) of Poly(I:C) or saline (control) at the gestation stage 15. PPI levels of their offspring were measured at the adult stage with 82-dB prepulses and 120-dB main startle pulses. \* $P < 0.05$  by T-test (n = 8 pups for control, 8 pups for 2 mg/kg, 12 pups for 4 mg/kg and 16 pups for 8 mg/kg). The figure was re-drawn from the data of the annual report to the private foundation as indicated below;

*Aoki H, Mizuno M, Kakita A, Nawa H. Experimental evaluation of the maternal viral infection hypothesis of schizophrenia; contribution of cytokine induction. Annual Report of Phearmacopsychiatry Research (Japanese) 2006; 38: 204-209.*

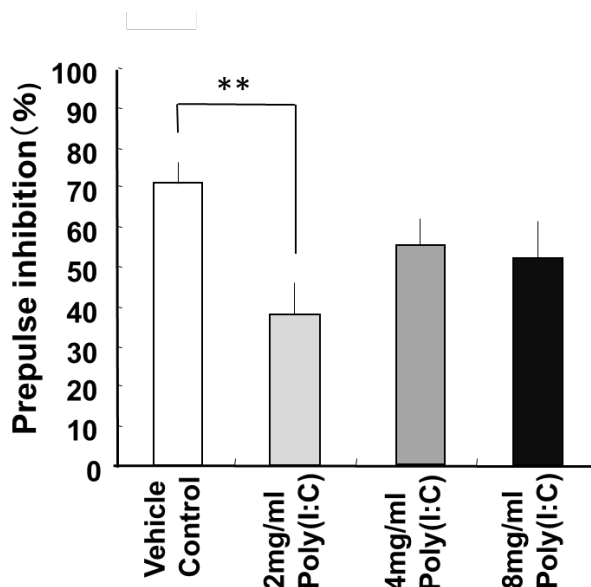

Note; The number of pregnant dams was n=2 for control and 2 mg/kg Poly(I:C) groups and n=3 for 4 mg/kg and 8 mg/kg Poly(I:C) groups. With the given heterogeneity of data deviation among groups, we failed to apply ANOVA.

**Supplementary Table S1**; the sample number of mouse dams and pups born

Main effects and interactions of the subject factors of breeder (3), Poly(I:C)(2), and sex (2)

| Subject                      | Breeder | The number of the dam/<br>The number of the offspring       | Factors                                    | F value and p value                 |
|------------------------------|---------|-------------------------------------------------------------|--------------------------------------------|-------------------------------------|
| Prepulse inhibition          | All     | Saline : 11/♂ : 30, ♀ : 35<br>Poly(I:C) : 14/♂ : 40, ♀ : 37 | Breeder                                    | F(2, 130)=0.760, p=0.470            |
|                              |         |                                                             | Poly(I:C)                                  | F(1, 130)=1.236, p=0.268            |
|                              |         |                                                             | Sex                                        | F(1, 130)=0.098, p=0.754            |
|                              |         |                                                             | Interaction(Breeder X Poly(I:C))           | F(2, 130)=3.206, <b>p=0.044</b>     |
|                              |         |                                                             | Interaction(Breeder X Sex)                 | F(2, 130)=0.762, p=0.469            |
|                              |         |                                                             | Interaction(Sex X Poly(I:C))               | F(1, 130)=0.014, p=0.906            |
|                              |         |                                                             | Interaction<br>(Breeder X Poly(I:C) X Sex) | F(2, 130)=0.132, p=0.876            |
|                              | CLEA    | Saline : 3/♂ : 7, ♀ : 10<br>Poly(I:C) : 6/♂ : 23, ♀ : 16    | Poly(I:C)                                  | F(1, 52)=5.659, <b>p=0.021</b>      |
|                              |         |                                                             | Sex                                        | F(1, 52)=0.005, p=0.944             |
|                              |         |                                                             | Interaction(Poly(I:C) X Sex)               | F(1, 52)=0.164, p=0.687             |
|                              | Charles | Saline : 3/♂ : 11, ♀ : 10<br>Poly(I:C) : 3/♂ : 8, ♀ : 6     | Poly(I:C)                                  | F(1, 31)=0.725, p=0.401             |
|                              |         |                                                             | Sex                                        | F(1, 31)=0.155, p=0.697             |
|                              |         |                                                             | Interaction(Poly(I:C) X Sex)               | F(1, 31)=0.075, p=0.786             |
|                              | SLC     | Saline : 5/♂ : 12, ♀ : 15<br>Poly(I:C) : 5/♂ : 9, ♀ : 15    | Poly(I:C)                                  | F(1, 47)=1.960, p=0.168             |
|                              |         |                                                             | Sex                                        | F(1, 47)=1.654, p=0.205             |
| Interaction(Poly(I:C) X Sex) |         |                                                             | F(1, 47)=0.071, p=0.792                    |                                     |
| Startle respnse              | All     | Saline : 11/♂ : 30, ♀ : 35<br>Poly(I:C) : 14/♂ : 40, ♀ : 37 | Breeder                                    | F(2, 130)=5.680, <b>p=0.004</b>     |
|                              |         |                                                             | Poly(I:C)                                  | F(1, 130)=0.892, p=0.347            |
|                              |         |                                                             | Sex                                        | F(1, 130)=20.188, <b>p&lt;0.001</b> |
|                              |         |                                                             | Interaction(Breeder X Poly(I:C))           | F(2, 130)=1.383, p=0.254            |
|                              |         |                                                             | Interaction(Breeder X Sex)                 | F(2, 130)=0.054, p=0.947            |
|                              |         |                                                             | Interaction(Poly(I:C) X Sex)               | F(1, 130)=3.157, p=0.078            |
|                              |         |                                                             | Interaction<br>(Breeder X Poly(I:C) X Sex) | F(2, 130)=0.613, p=0.543            |
| Adaptation rate              | All     | Saline : 11/♂ : 30, ♀ : 35<br>Poly(I:C) : 14/♂ : 40, ♀ : 37 | Breeder                                    | F(2, 130)=0.347, p=0.707            |
|                              |         |                                                             | Poly(I:C)                                  | F(1, 130)=1.081, p=0.300            |
|                              |         |                                                             | Sex                                        | F(1, 130)=0.215, p=0.644            |
|                              |         |                                                             | Interaction(Breeder X Poly(I:C))           | F(2, 130)=0.214, p=0.807            |
|                              |         |                                                             | Interaction(Breeder X Sex)                 | F(2, 130)=1.512, p=0.222            |
|                              |         |                                                             | Interaction(Poly(I:C) X Sex)               | F(1, 130)=2.885, p=0.092            |
|                              |         |                                                             | Interaction<br>(Breeder X Poly(I:C) X Sex) | F(2, 130)=0.628, p=0.535            |
